# Supplementary material for: Igalan attenuates sepsis-induced inflammation through covalent targeting of the NLRP3 inflammasome pathway
Source: Royal Society of Chemistry journal article supplement (doi:10.1039/d5cb00280j), 2026-04-23
Supplement: d5cb00280j2.pdf [file d5cb00280j2.pdf]

# Supplementary Materials for

## Igalan Attenuates Sepsis-Induced Inflammation through Covalent Targeting of the NLRP3 Inflammasome Pathway

Chengchen Hou *et al.*

Corresponding author: Nilufar Z. Mamadalieva, nmamadalieva@yahoo.com;

Hua Wang, wanghua@ahmu.edu.cn; Kewu Zeng, ZKW@bjmu.edu.cn

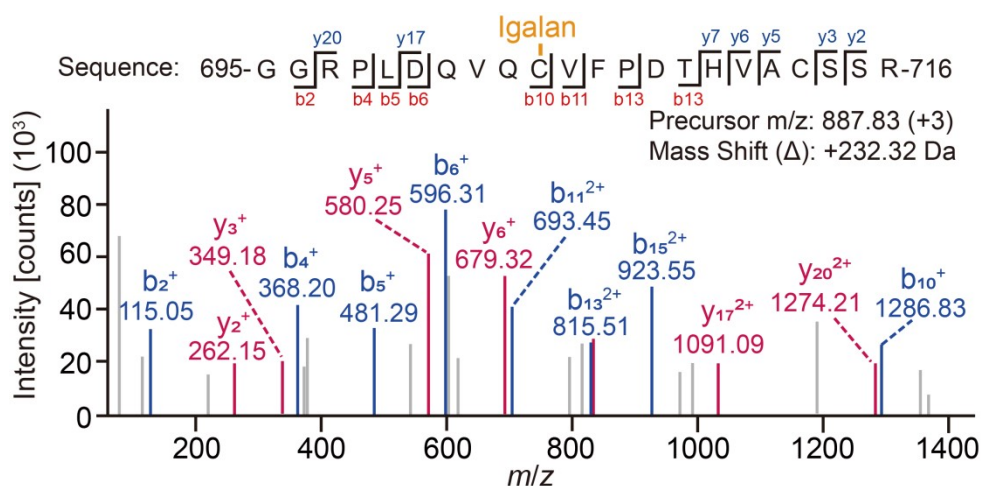

**Fig. S1. High-resolution MS/MS spectrum of the Igalan-modified NLRP3 peptide.**

The precursor ion (m/z 887.83, charge +3) spanning NLRP3 residues 695–716 (Sequence: GGRPLDQVQC[V]FPDTHVACSSR) was fragmented using HCD. A precise mass shift of +232.32 Da, corresponding to the covalent adduction of Igalan, is consistently observed on specific fragment ions. The presence of unmodified N-terminal b-ions (e.g., b<sub>6</sub><sup>+</sup>) and C-terminal y-ions (e.g., y<sub>6</sub><sup>+</sup>) explicitly indicates that the adjacent residues, including Cys713, remain intact. The concurrent identification of these unmodified ions alongside the modified fragments encompassing Cys704 (such as b<sub>10</sub><sup>+</sup>, b<sub>11</sub><sup>2+</sup>, and y<sub>17</sub><sup>2+</sup>) unambiguously pinpoints the covalent modification site specifically to Cys704.

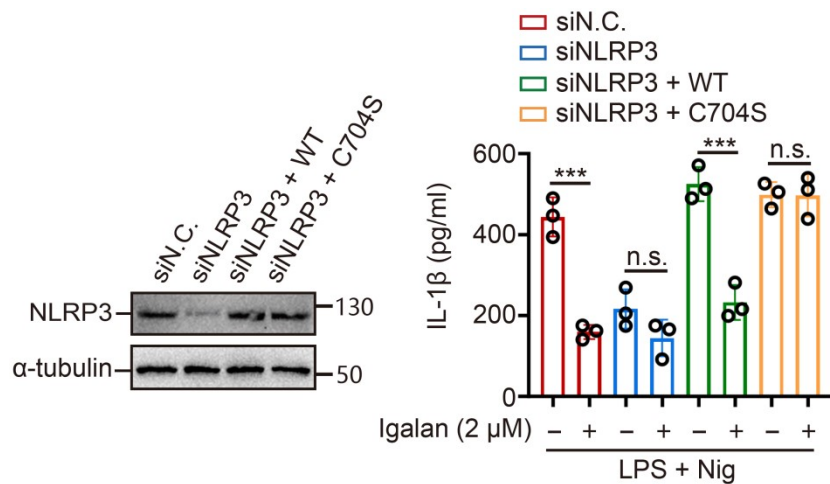

**Fig. S2. Cys704 is essential for Igalan-mediated inhibition of the NLRP3 inflammasome.**

iBMDMs were transfected with scramble siRNA (siN.C.) or NLRP3-targeting siRNA (siNLRP3), followed by reconstitution with either wild-type (WT) or C704S mutant NLRP3 plasmids. (Left) Western blot analysis confirming the successful knockdown of endogenous NLRP3 and the comparable reconstitution of WT and C704S mutant NLRP3 proteins.  $\alpha$ -tubulin was used as a loading control. (Right) The indicated cells were primed with LPS and stimulated with Nigericin (Nig) in the presence or absence of Igalan (2  $\mu$ M). IL-1 $\beta$  levels in the culture supernatants were quantified by ELISA. Igalan significantly inhibited IL-1 $\beta$  release in WT-reconstituted cells but failed to suppress inflammasome activation in C704S-reconstituted cells. Data are presented as mean  $\pm$  SEM (n = 3). \*\*\* $P$  < 0.001; n.s., not significant.

**Table S1 . Comprehensive list of cellular proteins and specific cysteine residues covalently modified by Igalan.**

140 proteins each containing at least one peptide with the +232.32 Da mass shift on a cysteine residue.

| Protein (UniProt ID) | Modified Peptide Sequence | Modified Cysteine |
|----------------------|---------------------------|-------------------|
| Nova2 (A0A1W2P872)   | KRPLETPPEVVC(1)TK         | C21               |
| Sertad4 (A7DTG3)     | LC(0.014)C(0.986)NRGGK    | C371              |
| Skint8 (A7XV07)      | LSPTC(1)LAKWEK            | C358              |
| Brpf1 (B2RRD7)       | LTC(0.621)YIC(0.379)KQR   | C385              |
| Trappc11 (B2RXC1)    | EIIC(0.086)KC(0.914)HK    | C874              |
| Piezo1 (E2JF22)      | QHQQAPLPAQAVC(1)ADGTR     | C962              |
| Bod1l (E9Q6J5)       | DC(1)LADVDTKPAYQNLK       | C72;60            |
| Morc3 (F7BJB9)       | LLEMNDKC(1)VK             | C741              |
| Zfpm1 (O35615)       | KDDALWC(1)R               | C188              |

|                   |                                    |          |
|-------------------|------------------------------------|----------|
| Coro1a (O89053)   | DGALIC(0.997)TSC(0.003)R           | C192     |
| Afp (P02772)      | MVSIASC(0.5)C(0.5)QLSEEK           | C457     |
| Aldoc (P05064)    | C(1)QYVTEK                         | C202     |
| Tuba1b (P05213)   | AYHEQLSVAEITNAC(1)FEPANQMVK        | C295     |
| Gnai2 (P08752)    | IIHEDGYSEEEC(1)R                   | C66      |
| Anxa1 (P10107)    | C(1)ATSTPAFFAEK                    | C270     |
| Eef1a1 (P10126)   | PMC(1)VESFSDYPPLGR                 | C411     |
| Ctsb (P10605)     | GENHC(1)GIESEIVAGIPR               | C319     |
| Hsp90ab1 (P11499) | C(1)LELFSELAEDKENYK                | C412     |
| Tcp1 (P11983)     | SLHDALC(1)VVK                      | C397     |
| Pfkl (P12382)     | LPLMEC(1)VQVTK                     | C351     |
| Nr4a1 (P12813)    | NRC(0.5)QFC(0.5)RFQK               | C325     |
| Gsn (P13020)      | SEDC(1)FILDHGR                     | C329     |
| Calr (P14211)     | DMHGDSEYNIMFGPDIC(1)GPGTK          | C137     |
| Lgals1 (P16045)   | DSNNLC(1)LHFNPR                    | C43      |
| F9 (P16294)       | NC(0.5)ELDATC(0.5)NIK              | C134     |
| Gapdh (P16858)    | IVSNASC(0.999)TTNC(0.001)LAPLAK    | C150     |
| Gapdh (P16858)    | VPTPNVSVVDLTC(1)R                  | C245;351 |
| Eno1 (P17182)     | SCNC(1)LLLK                        | C339     |
| Pcna (P17918)     | C(1)AGNEDIITLR                     | C81      |
| Tgm2 (P21981)     | DHHTADLC(1)QEK                     | C27      |
| Glud1 (P26443)    | C(1)AVVDVPFGGAK                    | C172     |
| Rpl3 (P27659)     | VAC(1)IGAWHPAR                     | C253     |
| Apex1 (P28352)    | IC(1)SWNVDDLGR                     | C64      |
| Atxn10 (P28658)   | STHAVELAC(1)R                      | C65      |
| Mmp2 (P33434)     | VLC(0.028)VLC(0.486)C(0.486)LLGR   | C22      |
| Ranbp1 (P34022)   | AWVWNTHADFADEC(1)PKPELLAIR         | C132     |
| Prdx1 (P35700)    | HGEVC(1)PAGWKPGSDTIKPDVVK          | C173     |
| Por (P37040)      | LIHEGGAHIYVC(1)GDAR                | C630     |
| Cap1 (P40124)     | C(1)VNTTLQIK                       | C355     |
| Cct8 (P42932)     | AHEILPELVC(0.189)C(0.811)SAK       | C149     |
| Akr1b1 (P45376)   | VC(1)ALMSCAK                       | C299     |
| Psmc2 (P46471)    | TDAC(1)FIR                         | C236     |
| Pkm (P52480)      | AEGSDVANAVLDGADC(1)IMLSGETAK       | C358     |
| Cox6b1 (P56391)   | NC(1)WQNYLDFHR                     | C30      |
| Cox17 (P56394)    | KPLKPC(0.306)C(0.306)AC(0.389)PETK | C26      |
| Eef2 (P58252)     | EGALC(1)EENMR                      | C693     |
| Pcbp1 (P60335)    | VMTIPYQMPASSPVIC(1)AGGQDR          | C194     |
| Rps11 (P62281)    | C(1)PFTGNVSIR                      | C60      |
| Rpl18a (P62717)   | C(1)HTPPLYR                        | C22      |
| Hpcal1 (P62748)   | DC(1)PTGHILTVEFK                   | C38      |
| Rps28 (P62858)    | TGSQGQC(1)TQVR                     | C27      |

|                  |                                     |              |
|------------------|-------------------------------------|--------------|
| Rpl30 (P62889)   | TGVHHYSGNNIELGTAC(1)GK              | C85          |
| Pfn1 (P62962)    | KC(1)YEMASHLR                       | C128         |
| Rps27a (P62983)  | C(0.5)C(0.5)LTYCFNKPEDK             | C145         |
| Rac1 (P63001)    | HHC(1)PNTPIILVGTK                   | C105         |
| Dynll1 (P63168)  | YNPTWHC(1)IVGR                      | C56          |
| Rps12 (P63323)   | QAHLCVLASNC(1)DEPMYVK               | C56          |
| Tuba1c (P68373)  | AYHEQLTVAEITNAC(1)FEPANQMVK         | C295         |
| Kpnb1 (P70168)   | HFIMQVVC(0.001)EATQC(0.999)PDTR     | C228         |
| Rps3a (P97351)   | AC(1)QSIYPLHDFVFR                   | C201         |
| Psme2 (P97372)   | C(1)GYLPGNEK                        | C91          |
| Rps5 (P97461)    | KAQC(1)PIVER                        | C66          |
| Fxyd5 (P97808)   | QLSQFC(1)LNR                        | C173         |
| Tubb4b (P99024)  | TAVC(1)DIPPR                        | C354         |
| Tfdp1 (Q08639)   | TVIDC(1)SISNDK                      | C274         |
| Gpr15 (Q0VDU3)   | CLC(0.5)PC(0.5)LK                   | C320         |
| Esyt2 (Q3TZZ7)   | AC(1)DLPAAVHFPDTER                  | C105         |
| Vwce (Q3U515)    | ASPQSDC(0.667)C(0.667)TC(0.667)VPGR | C488         |
| Cmpk2 (Q3U5Q7)   | MENPSC(1)HLVDASPSR                  | C422         |
| Zswim8 (Q3UHH1)  | IPRGPSEMSTIRC(1)R                   | C901         |
| Tars2 (Q3UQ84)   | GPAGTPEC(1)PVLIIHR                  | C585         |
| Defa20 (Q45VN2)  | LLFC(1)C(1)RR                       | C89          |
| Prss53 (Q571E5)  | PTC(1)NCLYNR                        | C187         |
| Cage1 (Q5IR70)   | SASQC(1)LEIEK                       | C447         |
| Ras110b (Q5SSG5) | SVGC(0.91)ARC(0.09)K                | C179         |
| P4ha1 (Q60715)   | HAAC(1)PVLVGNK                      | C503         |
| Vdac2 (Q60930)   | VC(1)EDFDTSVNLAWTSGTNCTR            | C211         |
| Ppp2r5c (Q60996) | C(1)VSSPHFQVAER                     | C334;365;351 |
| Asns (Q61024)    | YHHC(1)TDEPLHAIYDSVEK               | C207         |
| Soat1 (Q61263)   | EVGC(1)HFDDFVTNLIK                  | C61          |
| Hspa4 (Q61316)   | KFDEVLVNHFC(1)EEFGK                 | C245         |
| Stxbp2 (Q64324)  | KVTELLKTFC(1)ESK                    | C311         |
| Cltc (Q68FD5)    | RDPHLAC(1)VAYER                     | C918         |
| FAM120A (Q6A0A9) | AHQLVLPPC(1)DVVIK                   | C279;350     |
| Nop58 (Q6DFW4)   | LNLSC(1)IHSPVVNELMR                 | C106         |
| Eif4g1 (Q6NZJ6)  | NHDEESLEC(0.999)LC(0.001)R          | C938;923     |
| Tnpo3 (Q6P2B1)   | AIHNIC(1)SVCR                       | C527         |
| Xpo1 (Q6P5F9)    | LFEFMHETHDGVQDMAC(1)DTFIK           | C585         |
| Oxsr1 (Q6P9R2)   | C(1)QTSMDELLK                       | C53;111      |
| Rps27 (Q6ZWY3)   | LTEGC(1)SFR                         | C77          |
| Uts2b (Q76511)   | AC(1)FWKYCV                         | C107         |
| Mybbp1a (Q7TPV4) | HQAQAC(1)LMLQK                      | C1028        |
| Ahcy1 (Q80SW1)   | FDNLYC(0.965)C(0.035)R              | C292;375     |

|                   |                                      |          |
|-------------------|--------------------------------------|----------|
| Sympk (Q80X82)    | ATNLC(1)FAER                         | C969     |
| CIMAP1C (Q810P2)  | INC(1)MPASC(1)K                      | C124     |
| Tufm (Q8BFR5)     | KGDEC(1)ELLGHNK                      | C290     |
| Ipo5 (Q8BKC5)     | CIEVMGDGC(1)LNNEHFEELGGILK           | C784     |
| Tmem214 (Q8BM55)  | ATPSC(1)PAAMK                        | C377     |
| Lars1 (Q8BMJ2)    | NMETFC(1)EESR                        | C556     |
| Nars1 (Q8BP47)    | YGTC(1)PHGGYGLGLER                   | C522     |
| Rpl24 (Q8BP67)    | VELC(1)SFSGYK                        | C6       |
| Flna (Q8BTM8)     | IEC(0.997)DDKGDGSC(0.003)DVR         | C623;619 |
| Iars1 (Q8BU30)    | FGWDC(1)HGLPVEYEIDK                  | C87      |
| Washc5 (Q8C2E7)   | LLC(1)FMIVK                          | C881     |
| Dock2 (Q8C3J5)    | GEQC(1)EPILR                         | C730     |
| Acat2 (Q8CAY6)    | VNIDGGAIALGHPLGASGC(1)R              | C360     |
| Eprs1 (Q8CGC7)    | LTSAINELNHC(1)LSLR                   | C105     |
| Nckap1l (Q8K1X4)  | EHAITNSGQFHC(1)QR                    | C338     |
| Aimp2 (Q8R010)    | PYHGGSAPLHVELPTC(1)MYR               | C23      |
| Kiaa0513 (Q8R0A7) | EKWC(1)HMTQEERDDSLR                  | C337     |
| Niban2 (Q8R1F1)   | GPTKEELC(1)K                         | C466     |
| Nlrp3 (Q8R4B8)    | GGRPLDQVQC(0.999)VFPDTHVAC(0.001)SSR | C704     |
| Ipo4 (Q8VI75)     | DNIC(1)GALAR                         | C963     |
| Oasl1 (Q8VI94)    | HYTLQHPVIEAC(1)VR                    | C287     |
| Ddx1 (Q91VR5)     | MHNQIPQITC(1)DGK                     | C396     |
| Xpo5 (Q924C1)     | ESLDQFDC(1)K                         | C1131    |
| Xpo6 (Q924Z6)     | EQLAESILHEGSTGC(1)R                  | C886     |
| Rap1b (Q99JI6)    | QWNNC(1)AFLESSAK                     | C141     |
| Psat1 (Q99K85)    | EC(1)PSVLDYK                         | C224     |
| Nasp (Q99MD9)     | KPTDGASSSNC(1)VTDISHLVR              | C694     |
| Gpmb (Q99P91)     | AYKPIGNC(1)PR                        | C535     |
| Nop16 (Q9CPT5)    | IEC(1)SHIR                           | C36      |
| Lap3 (Q9CPY7)     | SAGAC(1)TAAAFRLR                     | C462     |
| Rps21 (Q9CQR2)    | TYGIC(1)GAIR                         | C56      |
| Zwint (Q9CQU5)    | C(1)ALSEALPQVK                       | C118     |
| Rpl14 (Q9CR57)    | C(1)MQLTDFILK                        | C54      |
| Cul2 (Q9D4H8)     | MVADHLQLHSEC(1)HSIIQQR               | C282     |
| Idh3a (Q9D6R2)    | IEAAC(1)FATIK                        | C331     |
| Prps2 (Q9D7G0)    | VAILVDDMADTC(0.976)GTIC(0.024)HAADK  | C226     |
| Prkar1a (Q9DBC7)  | QIQC(1)LQK                           | C67      |
| Dync1h1 (Q9JHU4)  | ASLAC(1)GPMVK                        | C3387    |
| Aldh9a1 (Q9JLJ2)  | C(1)QVLLAAR                          | C74      |
| Cd5l (Q9QWK4)     | ELNC(1)GAVIQTPR                      | C70      |
| Ptges3 (Q9R0Q7)   | HLNEIDLFHC(1)IDPNDSK                 | C58      |
| Clec4e (Q9R0Q8)   | NCC(1)PLNWK                          | C80      |

|                 |                         |      |
|-----------------|-------------------------|------|
| Tagln2 (Q9WVA4) | NMAC(1)VQR              | C124 |
| Uba2 (Q9Z1F9)   | NTPSEPIHC(1)IVWAK       | C185 |
| Arih1 (Q9Z1K5)  | LFAEC(1)HVINPSK         | C159 |
| Bag6 (Q9Z1R2)   | C(0.999)NLAC(0.001)APPR | C346 |
| Hnrnpf (Q9Z2X1) | DLSYC(1)LSGMYDHR        | C267 |

This table details the 140 target proteins identified via high-resolution LC-MS/MS chemoproteomic profiling. Each listed entry represents a protein containing at least one unambiguously identified tryptic peptide harboring a specific mass shift of +232.32 Da on a cysteine residue, corresponding to the covalent adduction of Igalan. For each identified target, the canonical UniProt accession number is provided alongside its corresponding modified peptide sequence. Notably, the values in parentheses immediately following the modified cysteine within the sequence (e.g., C(1), C(0.986)) denote the site localization probability score generated by the search engine. A score of 1 indicates absolute confidence that the +232.32 Da modification is specifically localized to that exact residue, distinguishing it from other potential nucleophiles within the same peptide. Finally, the precise positional number of the modified cysteine within the full-length canonical protein sequence is explicitly defined for each target, providing a high-confidence molecular basis for the multi-target landscape of Igalan.
